# Supplementary material
Source: Atypon-hosted journal article supplement (doi:10.1287/mnsc.2024.05821)
Supplement: mnsc.2024.05821.sm1.pdf [file mnsc.2024.05821.sm1.pdf]

# Firm-Level Litigation Risk: Measurement and Effects

Benjamin Bennett Charles Ham Todd Milbourn Zexi Wang

Internet Appendix

**Table IA1: Common litigious words in 10-Ks**

This table presents a list of thirty of the most often mentioned litigious words (Column 1), negative litigious words (Column 2), non-negative litigious words (Column 3) in firm 10-K filings at the SEC. The word list is constructed based on Loughran and McDonald Master Dictionary.

| All             | Negative     | Non-Negative    |
|-----------------|--------------|-----------------|
| shall           | claims       | shall           |
| amended         | litigation   | amended         |
| laws            | breach       | laws            |
| regulatory      | alleged      | regulatory      |
| regulations     | criminal     | regulations     |
| claims          | defendants   | herein          |
| herein          | plaintiffs   | law             |
| law             | breaches     | contracts       |
| contracts       | plaintiff    | amendment       |
| amendment       | alleging     | contract        |
| contract        | allegations  | legal           |
| legal           | revocation   | thereof         |
| thereof         | injunction   | consent         |
| consent         | defendant    | court           |
| court           | encumbrances | regulation      |
| regulation      | prosecution  | hereby          |
| hereby          | prejudice    | settlement      |
| settlement      | alleges      | hereunder       |
| hereunder       | breached     | hereof          |
| hereof          | redacted     | contractual     |
| litigation      | encumbrance  | thereto         |
| contractual     | unlawful     | jurisdiction    |
| thereto         | antitrust    | beneficial      |
| jurisdiction    | injunctions  | hereto          |
| beneficial      | allegedly    | notwithstanding |
| breach          | allege       | severance       |
| hereto          | felony       | thereafter      |
| notwithstanding | prosecute    | counsel         |
| severance       | incapacity   | amendments      |
| thereafter      | sue          | duly            |

**Table IA2: Lawsuit Likelihood and Litigation Risk: More vs. Less Liberal Courts**

This table presents the distributions of lawsuit likelihood in year  $t+1$  across quintiles of *Legal Risk* in year  $t$  for more vs. less liberal courts. Panel A covers securities lawsuits and Panel B covers non-securities lawsuits. Both panels split the sample based on the median of the liberal court measure from Huang, Hui, and Li (2019). Variable definitions are in Appendix A.

## Panel A: Securities lawsuit likelihood across litigation risk quintiles: More vs. Less Liberal Courts

| More Liberal Court            |                    | Less Liberal Court            |                    |
|-------------------------------|--------------------|-------------------------------|--------------------|
| Legal Risk Quintile           | Lawsuit likelihood | Legal Risk Quintile           | Lawsuit likelihood |
| 1 (bottom)                    | 0.044              | 1 (bottom)                    | 0.039              |
| 2                             | 0.060              | 2                             | 0.046              |
| 3                             | 0.079              | 3                             | 0.061              |
| 4                             | 0.100              | 4                             | 0.079              |
| 5 (top)                       | 0.124              | 5 (top)                       | 0.115              |
| top - bottom                  | 0.054              | top - bottom                  | 0.042              |
| <i>p</i> value (top - bottom) | 0.000              | <i>p</i> value (top - bottom) | 0.000              |

## Panel B: Non-Securities lawsuit likelihood across litigation risk quintiles: More vs. Less Liberal Courts

| More Liberal Court            |                    | Less Liberal Court            |                    |
|-------------------------------|--------------------|-------------------------------|--------------------|
| Legal Risk Quintile           | Lawsuit likelihood | Legal Risk Quintile           | Lawsuit likelihood |
| 1 (bottom)                    | 0.036              | 1 (bottom)                    | 0.062              |
| 2                             | 0.048              | 2                             | 0.074              |
| 3                             | 0.064              | 3                             | 0.104              |
| 4                             | 0.096              | 4                             | 0.144              |
| 5 (top)                       | 0.131              | 5 (top)                       | 0.185              |
| top - bottom                  | 0.159              | top - bottom                  | 0.194              |
| <i>p</i> value (top - bottom) | 0.000              | <i>p</i> value (top - bottom) | 0.000              |

**Table IA3. Robustness Tests: Logit Model**

This table shows the predictability of our litigation risk measure on future new lawsuits using a logit model, in which relevant firm characteristics are controlled for following KS. The specification is  $Lawsuit_{i,t+1} = \beta_0 + \beta_1 \cdot Legal\ Risk_{i,t} + X_{i,t} \cdot \Gamma + FEs + \varepsilon_{i,t+1}$ . *Lawsuit* is an indicator variable for the presence of a new lawsuit filed against a firm in year t+1. *Legal Risk* is the number of litigious words with negative connotation in a firm's 10-K filing scaled by the 10-K file size. *X* is the vector of control variables and *Γ* is the vector of the corresponding coefficients. *FEs* stands for various fixed effects as indicated in the bottom rows. Standard errors are clustered at the firm level. The sample period is 2000-2022. Variable definitions are in Appendix A. \*\*\*, \*\*, and \* denote significance at the 1%, 5%, and 10% levels, respectively.

| VARIABLES        | (1)<br>Lawsuit(t+1)  | (2)<br>Lawsuit(t+1)  | (3)<br>Lawsuit(t+1)  |
|------------------|----------------------|----------------------|----------------------|
| Legal Risk       | 1.038***<br>[4.03]   | 1.135***<br>[4.18]   | 1.023***<br>[3.89]   |
| Log(Assets)      | 0.513***<br>[14.77]  | 0.510***<br>[13.77]  | 0.505***<br>[14.15]  |
| Sales Growth     | 0.028<br>[1.21]      | 0.045*<br>[1.90]     | 0.035<br>[1.50]      |
| Excess Return    | -1.474***<br>[-4.04] | -1.378***<br>[-3.45] | -1.381***<br>[-3.71] |
| Skewness         | 0.007<br>[0.32]      | -0.007<br>[-0.31]    | 0.007<br>[0.33]      |
| Volatility       | 1.346***<br>[4.90]   | 1.157***<br>[3.88]   | 1.388***<br>[4.98]   |
| Turnover         | 0.366***<br>[4.21]   | 0.446***<br>[4.88]   | 0.355***<br>[3.96]   |
| Lawsuit(t)       | -0.135***<br>[-4.05] | -0.202***<br>[-5.64] | -0.141***<br>[-4.15] |
| Observations     | 48,152               | 46,478               | 47,092               |
| R-squared        | 0.187                | 0.221                | 0.194                |
| Firm FE          | Y                    | Y                    | Y                    |
| Year FE          | Y                    | N                    | N                    |
| Industry-Year FE | N                    | Y                    | N                    |
| Circuit-Year FE  | N                    | N                    | Y                    |

**Table IA4: Litigation Risk and Future Lawsuits: Additional Lags of Lawsuits**

This table shows robustness tests for the predictability of our litigation risk measure on future new lawsuits using a linear probability model, in which relevant firm characteristics are controlled for following KS. In particular, more lags of *Lawsuit* are included as additional control variables. The specification is  $Lawsuit_{i,t+1} = \beta_0 + \beta_1 \cdot Legal\ Risk_{i,t} + X_{i,t} \cdot \Gamma + FEs + \varepsilon_{i,t+1}$ . *Lawsuit* is an indicator variable for the presence of a new lawsuit filed against a firm in year t+1. *Legal Risk* is the number of litigious words with negative connotation in a firm's 10-K filing scaled by the 10-K file size. *X* is the vector of control variables and *Γ* is the vector of the corresponding coefficients. *FEs* stands for various fixed effects as indicated in the bottom rows. Standard errors are clustered at the firm level. The sample period is 2000-2022. Variable definitions are in Appendix A. \*\*\*, \*\*, and \* denote significance at the 1%, 5%, and 10% levels, respectively.

| VARIABLES        | (1)<br>Lawsuit(t+1)  | (2)<br>Lawsuit(t+1)  | (3)<br>Lawsuit(t+1)  |
|------------------|----------------------|----------------------|----------------------|
| Legal Risk       | 0.219***<br>[5.52]   | 0.241***<br>[6.13]   | 0.210***<br>[5.20]   |
| Lawsuit(t)       | -0.008<br>[-1.25]    | -0.017***<br>[-2.68] | -0.009<br>[-1.37]    |
| Lawsuit(t-1)     | -0.038***<br>[-6.40] | -0.042***<br>[-7.08] | -0.039***<br>[-6.58] |
| Lawsuit(t-2)     | -0.036***<br>[-6.27] | -0.040***<br>[-6.93] | -0.036***<br>[-6.07] |
| Log(Assets)      | 0.047***<br>[11.12]  | 0.046***<br>[10.63]  | 0.047***<br>[10.74]  |
| Sales Growth     | -0.003<br>[-1.26]    | -0.002<br>[-0.84]    | -0.003<br>[-1.10]    |
| Excess Return    | -0.108***<br>[-2.58] | -0.117***<br>[-2.62] | -0.106**<br>[-2.46]  |
| Skewness         | 0.000<br>[0.13]      | -0.001<br>[-0.42]    | 0.000<br>[0.03]      |
| Volatility       | 0.072**<br>[2.35]    | 0.065**<br>[2.05]    | 0.079**<br>[2.54]    |
| Turnover         | 0.046***<br>[4.85]   | 0.052***<br>[5.31]   | 0.047***<br>[4.71]   |
| Observations     | 56,867               | 56,782               | 55,590               |
| R-squared        | 0.313                | 0.342                | 0.316                |
| Firm FE          | Y                    | Y                    | Y                    |
| Year FE          | Y                    | N                    | N                    |
| Industry-Year FE | N                    | Y                    | N                    |
| Circuit-Year FE  | N                    | N                    | Y                    |

**Table IA5. Comparison Between Probability-Prediction Measure and Our Measure**

This table illustrates the incremental predictive power of our litigation risk measure when including a probability-based litigation risk measure from KS (2012). *Lawsuit* is an indicator variable for the presence of a new lawsuit filed against a firm in year t+1. *Legal Risk* is the number of litigious words with negative connotation in a firm's 10-K filing scaled by the 10-K file size. *Prob. Pred.* is the predicted value using the KS model (Model 3 of their Table 7) to predict a lawsuit in year t+1. Fixed effects are illustrated in the bottom rows. Standard errors are clustered at the firm level. The sample period is 2000-2022. Variable definitions are in Appendix A. \*\*\*, \*\*, and \* denote significance at the 1%, 5%, and 10% levels, respectively.

| VARIABLES       | (1)<br>Lawsuit(t+1) | (2)<br>Lawsuit(t+1) | (3)<br>Lawsuit(t+1) |
|-----------------|---------------------|---------------------|---------------------|
| Legal Risk      | 0.151***<br>[4.55]  |                     | 0.128***<br>[3.92]  |
| Prob. Pred.     |                     | 0.779***<br>[15.72] | 0.770***<br>[15.63] |
| Observations    | 74,242              | 74,242              | 74,242              |
| R-squared       | 0.296               | 0.299               | 0.300               |
| Firm FE         | Y                   | Y                   | Y                   |
| Circuit-Year FE | Y                   | Y                   | Y                   |

**Table IA6: Predictability for Specific Types of Non-Securities Lawsuits**

This table shows the predictability of our litigation risk measure for specific types of future non-securities lawsuits using a linear probability model, in which relevant firm characteristics are controlled for following KS. The specification is  $Y_{i,t+1} = \beta_0 + \beta_1 \cdot \text{Legal Risk}_{i,t} + X_{i,t} \cdot \Gamma + \text{FES} + \varepsilon_{i,t+1}$ . The dependent variable is a dummy variable for a particular non-securities lawsuit type (patent, contract, antitrust, injury, or ERISA) filed against a firm in year t+1. *Legal Risk* is the number of litigious words with negative connotation in a firm's 10-K filing scaled by the 10-K file size. The sample period is 2000-2022. Standard errors are clustered at the firm level. Firm fixed effects and circuit-year fixed effects are included. Variable definitions are in Appendix A. \*\*\*, \*\*, and \* denote significance at the 1%, 5%, and 10% levels, respectively.

| VARIABLES       | (1)<br>PatentSuit  | (2)<br>ContractSuit  | (3)<br>AntitrustSuit | (4)<br>InjurySuit    | (5)<br>ERISASuit     |
|-----------------|--------------------|----------------------|----------------------|----------------------|----------------------|
| Legal Risk      | 0.041**<br>[2.05]  | 0.050***<br>[3.54]   | 0.036***<br>[3.28]   | 0.015*<br>[1.69]     | 0.004<br>[0.42]      |
| Log(Assets)     | 0.007***<br>[3.23] | 0.004***<br>[3.04]   | 0.003***<br>[3.54]   | 0.003***<br>[3.83]   | 0.003***<br>[4.36]   |
| Sales Growth    | 0.001<br>[0.81]    | 0.000<br>[0.20]      | -0.001**<br>[-2.55]  | -0.000<br>[-0.35]    | -0.000<br>[-0.84]    |
| Excess Return   | 0.015<br>[0.80]    | -0.038***<br>[-2.79] | -0.011<br>[-1.46]    | -0.030***<br>[-4.39] | -0.035***<br>[-5.05] |
| Skewness        | 0.001<br>[0.64]    | 0.001<br>[1.17]      | 0.001***<br>[2.81]   | 0.001**<br>[2.16]    | -0.001<br>[-1.40]    |
| Volatility      | -0.016<br>[-1.11]  | 0.036***<br>[3.59]   | -0.002<br>[-0.31]    | 0.014***<br>[2.68]   | 0.026***<br>[4.67]   |
| Turnover        | 0.013***<br>[2.65] | 0.002<br>[0.57]      | -0.000<br>[-0.20]    | -0.002<br>[-1.02]    | -0.001<br>[-0.51]    |
| Lawsuit(t)      | 0.011***<br>[3.42] | -0.003<br>[-1.46]    | 0.005***<br>[2.79]   | 0.002<br>[1.44]      | 0.004***<br>[2.68]   |
| Observations    | 74,242             | 74,242               | 74,242               | 74,242               | 74,242               |
| R-squared       | 0.306              | 0.142                | 0.168                | 0.173                | 0.117                |
| Firm FE         | Y                  | Y                    | Y                    | Y                    | Y                    |
| Circuit-Year FE | Y                  | Y                    | Y                    | Y                    | Y                    |

**Table IA7. Robustness Tests: Litigation Risk and Firm Policies, Including Other Litigation Risk Measures**

This table shows the predictability of our litigation risk measure on future firm policies, as robustness tests for Panel A of Table 9. The specification is  $Y_{i,t+1} = \beta_0 + \beta_1 \cdot \text{Legal Risk}_{i,t} + \beta_2 \cdot \text{Prob. Pred.} + \beta_3 \cdot \text{Lawsuit} + X_{i,t} \cdot \Gamma + \text{FEs} + \varepsilon_{i,t+1}$ . *Legal Risk* is the number of litigious words with negative connotation in a firm's 10-K filing scaled by the 10-K file size. *Prob. Pred.* is the predicted value using the KS model (Model 3 of their Table 7) to predict a lawsuit in year t+1. *X* is the vector of control variables (corresponds to those in Table 7 or 8) and  $\Gamma$  is the vector of the corresponding coefficients. *FEs* stands for various fixed effects as indicated in the bottom rows. Standard errors are clustered at the firm level. The sample period is 2000-2022. Variable definitions are in Appendix A. \*\*\*, \*\*, and \* denote significance at the 1%, 5%, and 10% levels, respectively.

| VARIABLES       | (1)<br>Settl/Assets | (2)<br>Fine/Assets | (3)<br>Cash/Assets | (4)<br>Capex/Assets  | (5)<br>RD/Assets     | (6)<br>Acq/Assets    |
|-----------------|---------------------|--------------------|--------------------|----------------------|----------------------|----------------------|
| Legal Risk      | 0.007***<br>[14.18] | 0.041***<br>[5.26] | 0.043***<br>[3.07] | -0.009***<br>[-3.23] | -0.019***<br>[-3.32] | -0.013***<br>[-3.09] |
| Prob. Pred.     | 0.001<br>[0.80]     | 0.012<br>[0.76]    | 0.256***<br>[5.59] | -0.006<br>[-0.51]    | -0.123***<br>[-4.64] | -0.021*<br>[-1.75]   |
| Lawsuit         | 0.000***<br>[3.02]  | 0.001<br>[0.69]    | -0.001<br>[-0.55]  | -0.001**<br>[-2.39]  | 0.001**<br>[2.16]    | -0.000<br>[-0.67]    |
| Observations    | 62,930              | 63,845             | 67,504             | 68,812               | 68,812               | 68,812               |
| R-squared       | 0.217               | 0.228              | 0.831              | 0.718                | 0.835                | 0.255                |
| Controls        | Y                   | Y                  | Y                  | Y                    | Y                    | Y                    |
| Firm FE         | Y                   | Y                  | Y                  | Y                    | Y                    | Y                    |
| Circuit-Year FE | Y                   | Y                  | Y                  | Y                    | Y                    | Y                    |
